# Supplementary material for: A smart magnetic nanosystem for sequential extracellular and intracellular release of proteins for cancer therapy
Source: Royal Society of Chemistry journal article supplement (doi:10.1039/d3nr01794j), 2023-01-01
Supplement: d3nr01794j1.pdf [file d3nr01794j1.pdf]

## Electronic Supplementary Material

### Smart magnetic nanosystem sequentially extracellular and intracellular release proteins for cancer therapy

Yaxuan Zhao, Kai Feng, Guojun Lei, Jingjing Shen, Yang Liu, Yiling Ruan, Xiaolian Sun

*State Key Laboratory of Natural Medicines, Key Laboratory of Drug Quality Control and Pharmacovigilance, Department of Pharmaceutics, China Pharmaceutical University, Nanjing 210009, China*

Address correspondence to [xiaolian\\_sun@cpu.edu.cn](mailto:xiaolian_sun@cpu.edu.cn)

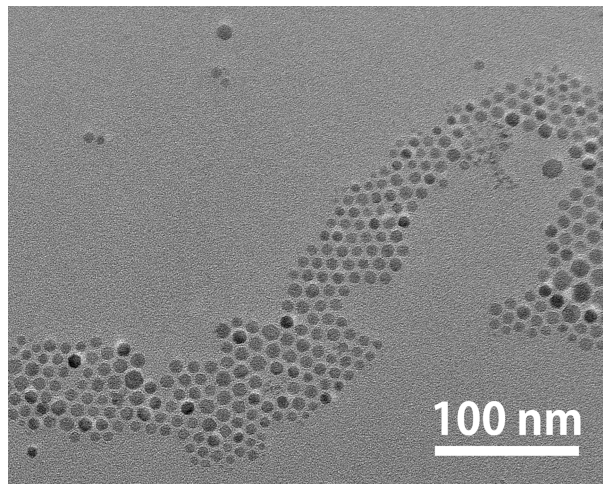

**Figure S1.** TEM image of IONPs

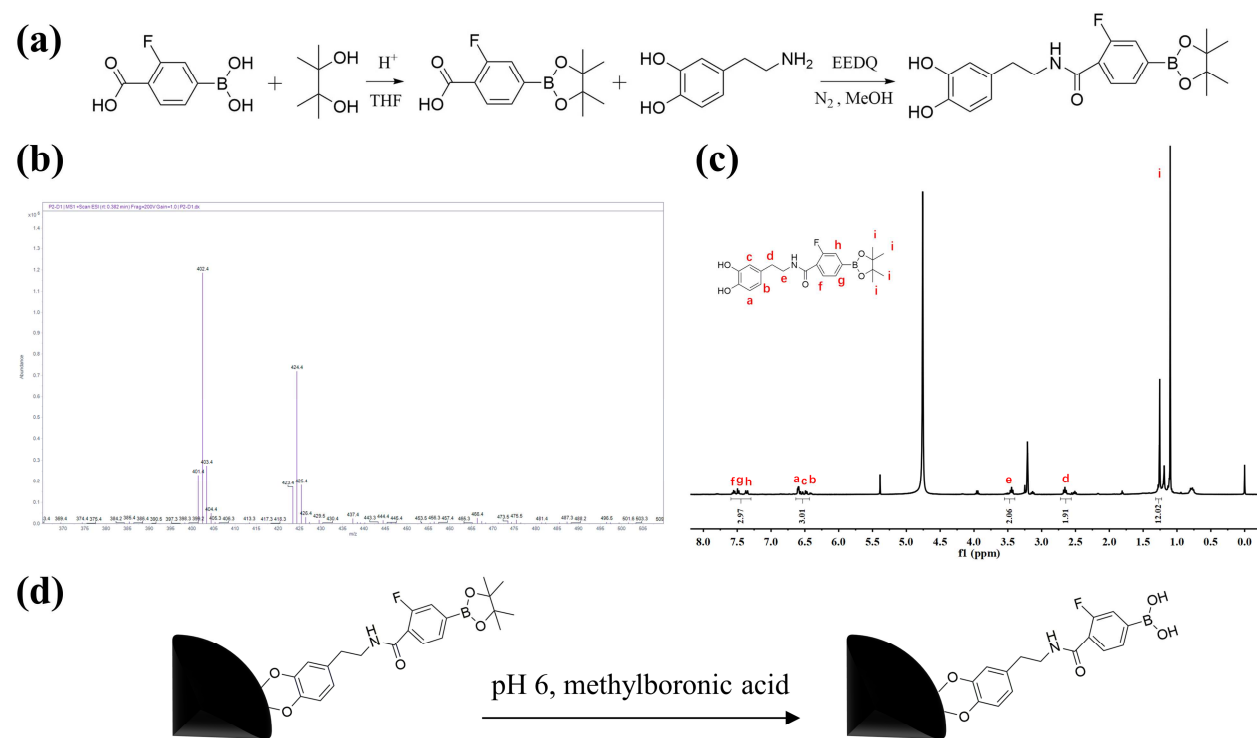

**Figure S2.** Characterization of the ligand. (a) Synthetic procedures of protected DPA-FPBA; (b) Mass spectrum of protected DPA-FPBA; (c)  $^1\text{H}$ -NMR spectrum of protected DPA-FPBA. (d) The process of removing pinacol from the protected DPA-FPBA.

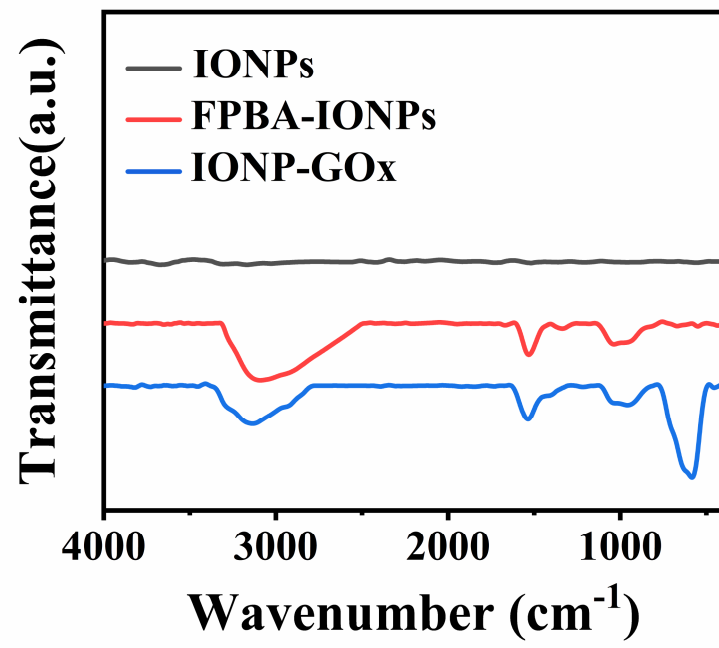

**Figure S3.** FT-IR spectra of IONPs, FPBA-IONPs and IONP-GOx.

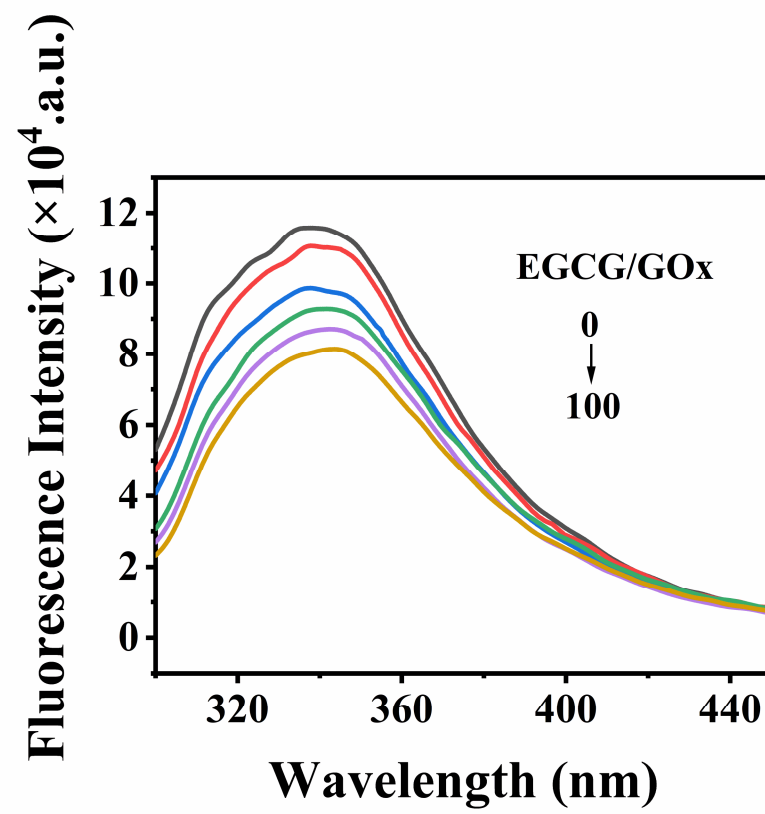

**Figure S4.** Fluorescence change of GOx in the presence of EGCG. The molar ratios of EGCG/GOx were 0:1, 10:1, 30:1, 50:1, 70:1 and 100:1.

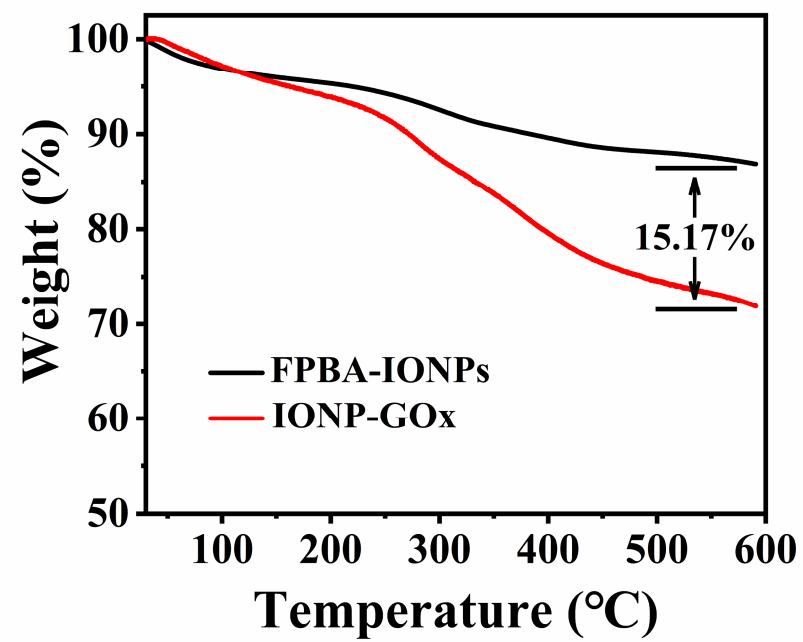

**Figure S5.** TGA curves of FPBA-IONPs and IONP-GOx in N<sub>2</sub>.

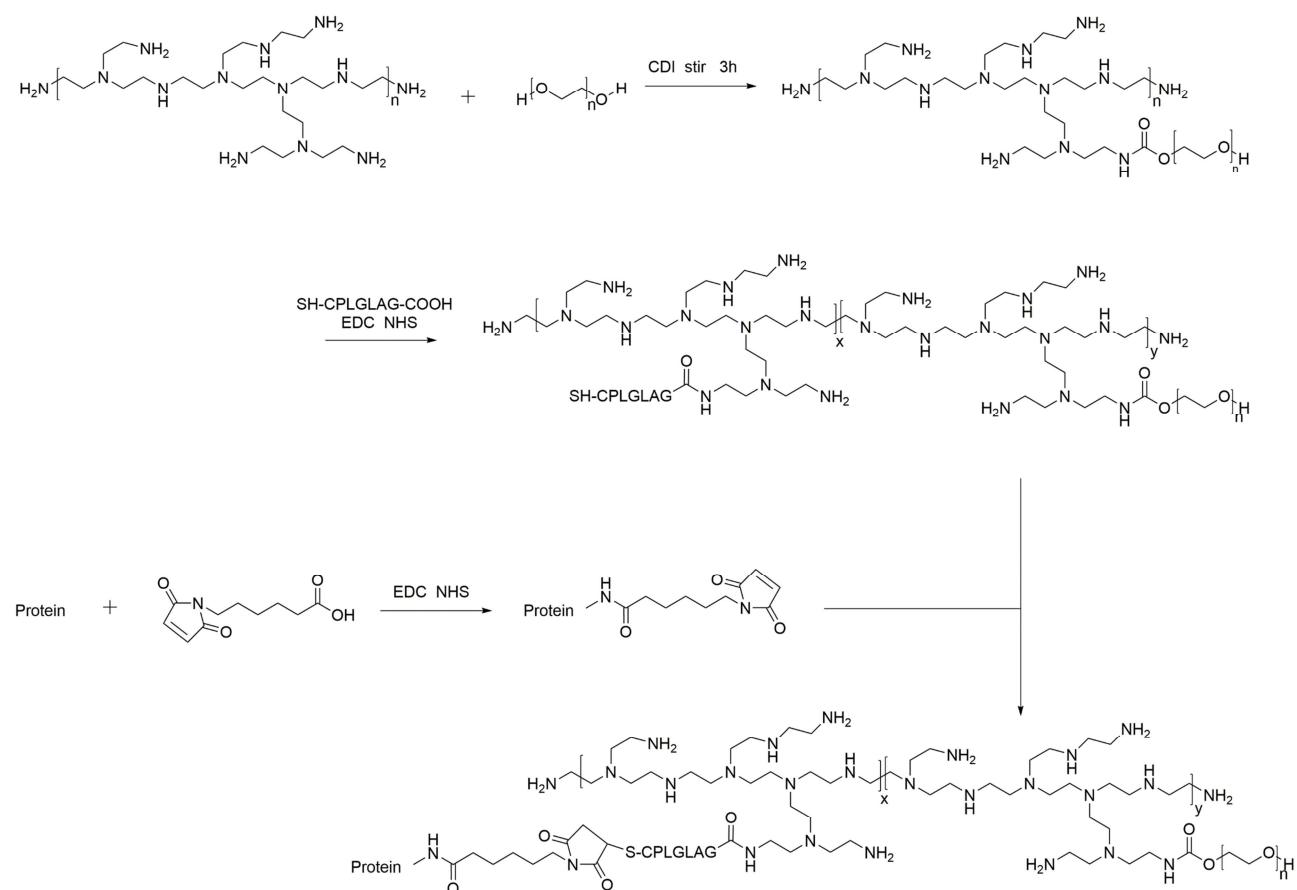

**Figure S6.** Synthesis of PEI-PEG-TRAIL.



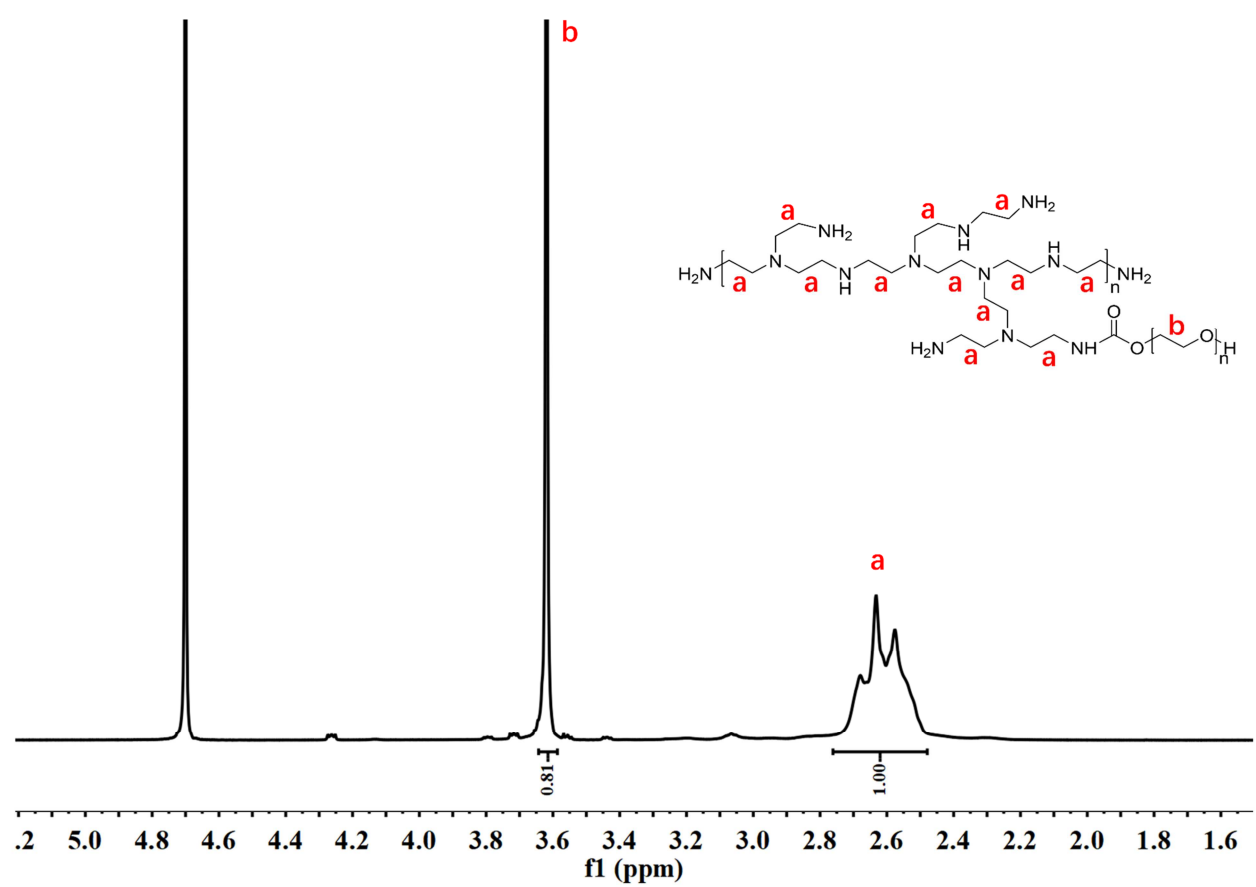

**Figure S7.**  $^1\text{H}$ -NMR spectrum of PEI-PEG.

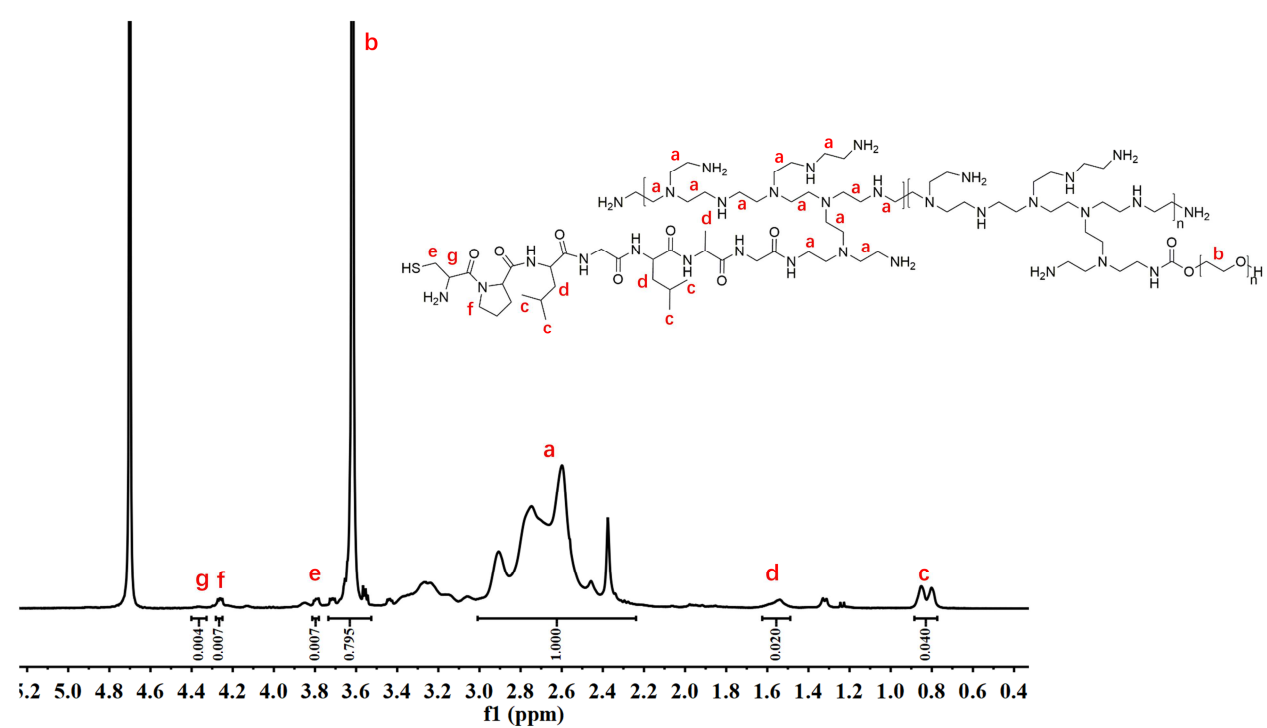

**Figure S8.**  $^1\text{H}$ -NMR spectrum of PEI-PEG-CPLGLAG.

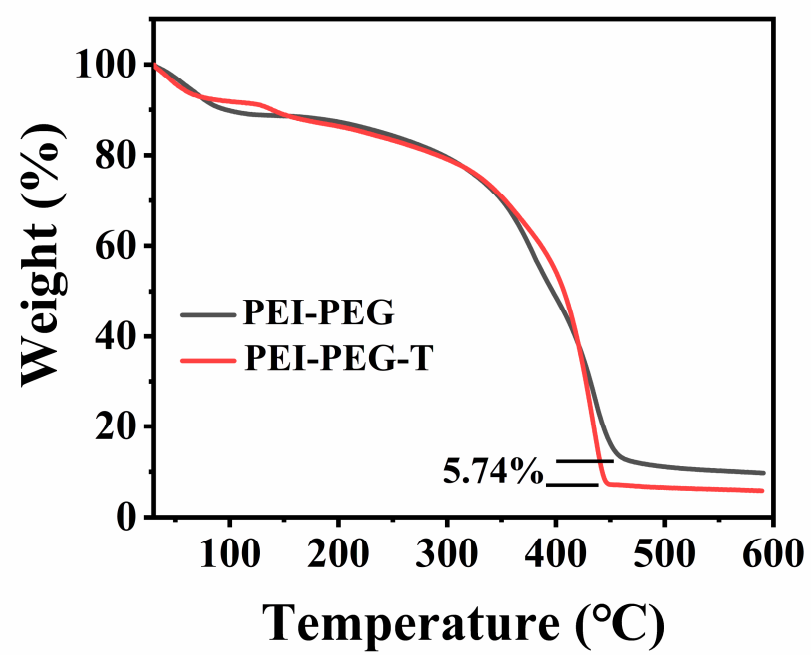

**Figure S9.** TGA curves of PEI-PEG and PEI-PEG-TRAIL in N<sub>2</sub>.

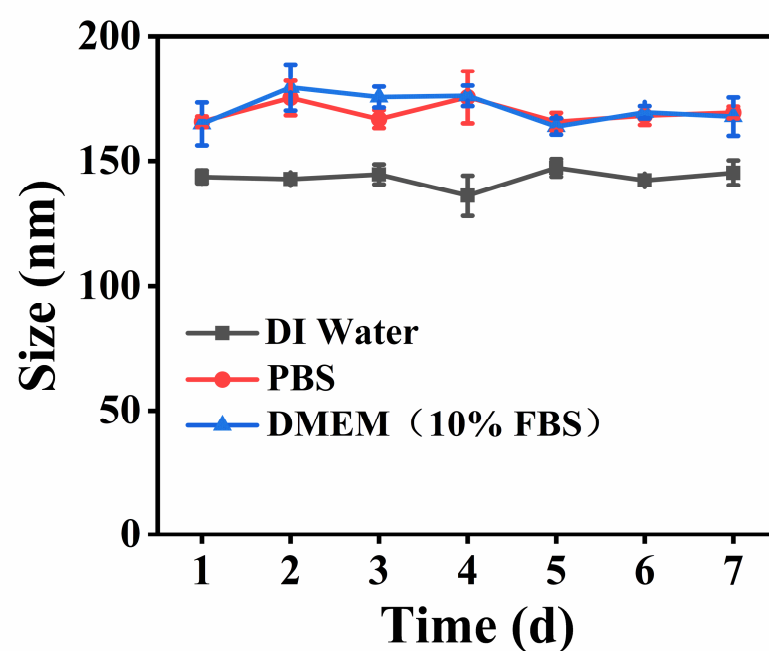

**Figure S10.** Hydrodynamic diameters of PEI-PEG-TRAIL@IONP-GOx in DI water, PBS, and DMEM (10% FBS) within 7 days. Data were represented as mean  $\pm$  SD (n = 3).

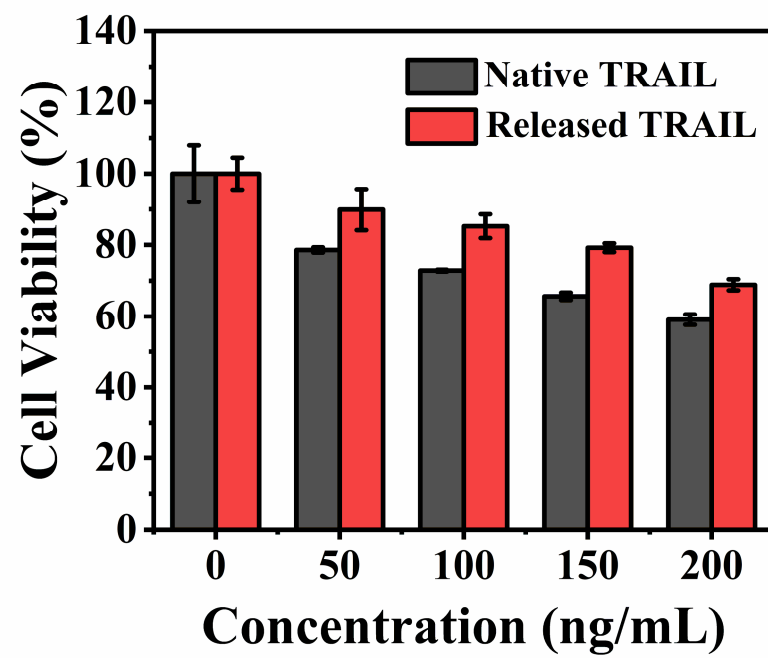

**Figure S11.** Cell cytotoxicity of standard native TRAIL solution and TRAIL released from PEI-PEG-TRAIL@IONP-GOx on HeLa cells for 24 h. Data were represented as mean  $\pm$  SD (n = 3).

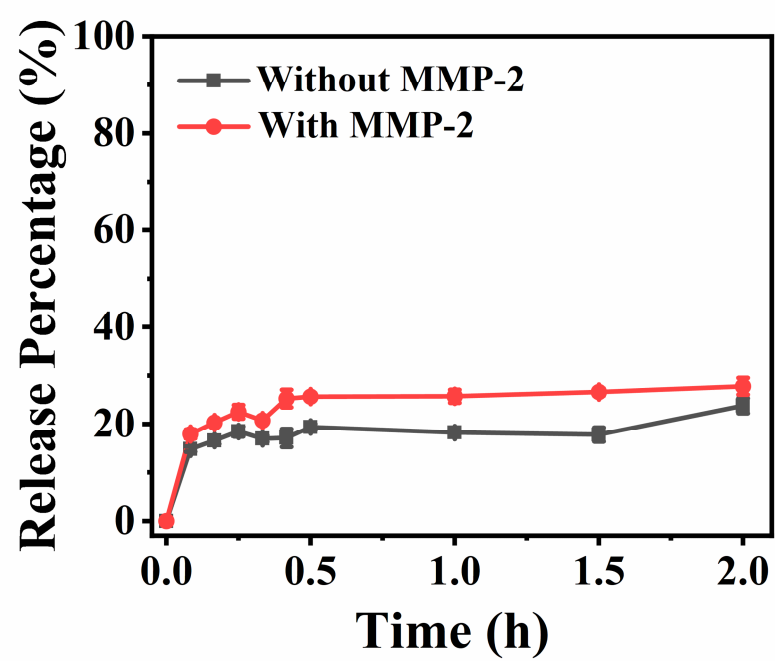

**Figure S12.** Release curves of GOx from PEI-PEG-TRAIL@IONP-GOx with or without type IV collagenase (20  $\mu$ g/mL). Data were represented as mean  $\pm$  SD (n = 3).

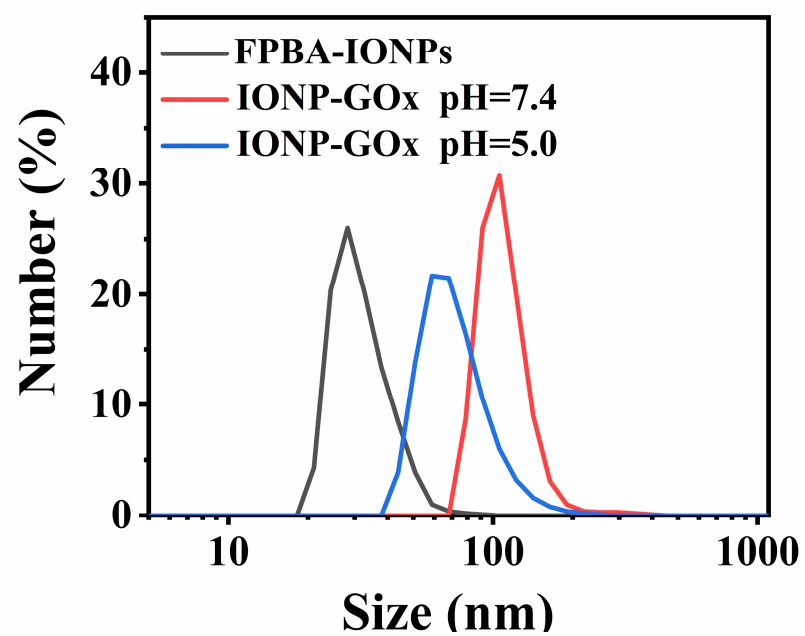

**Figure S13.** Hydrodynamic diameters of IONP-GOx after incubation at pH 7.4 and pH 5.5. Data were represented as mean  $\pm$  SD (n = 3).

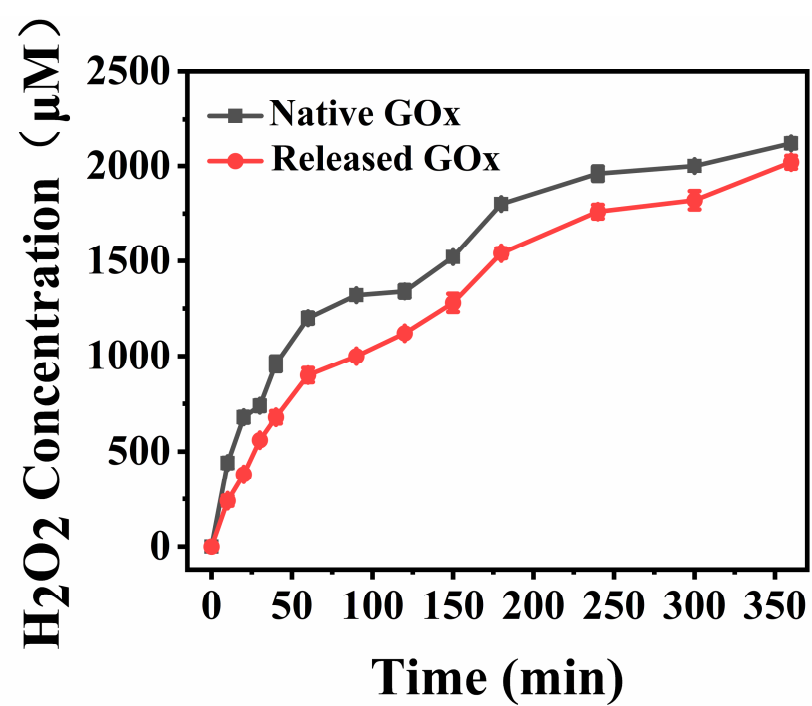

**Figure S14.** H<sub>2</sub>O<sub>2</sub> generation curves of standard native GOx solution and GOx released from IONP-GOx with the addition of glucose ([GOx] = 2  $\mu$ g/mL, [glucose] = 0.6 mg/mL). Data were represented as mean  $\pm$  SD (n = 3).

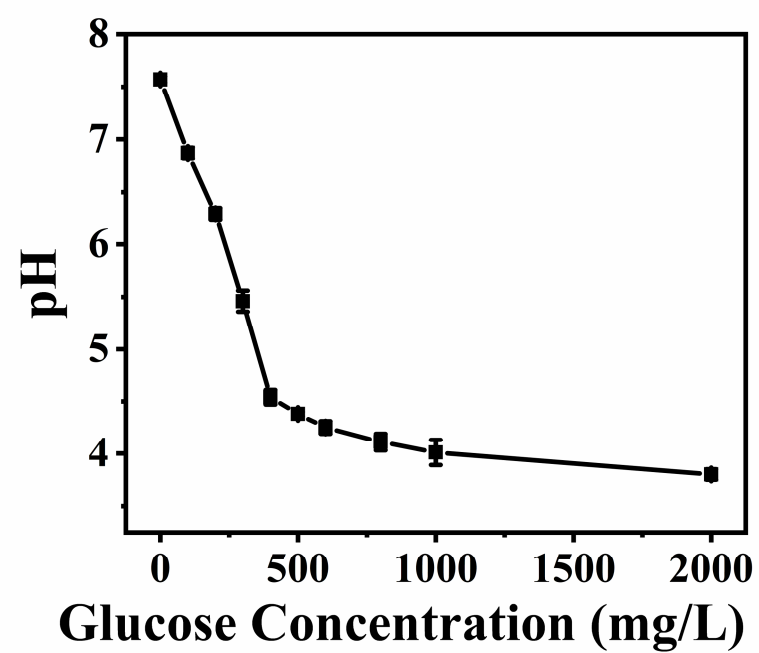

**Figure S15.** Glucose-dependent pH changes of the mixture of FPBA-IONPs and GOx ([GOx] = 2  $\mu\text{g/mL}$ ). Data were represented as mean  $\pm$  SD (n = 3).

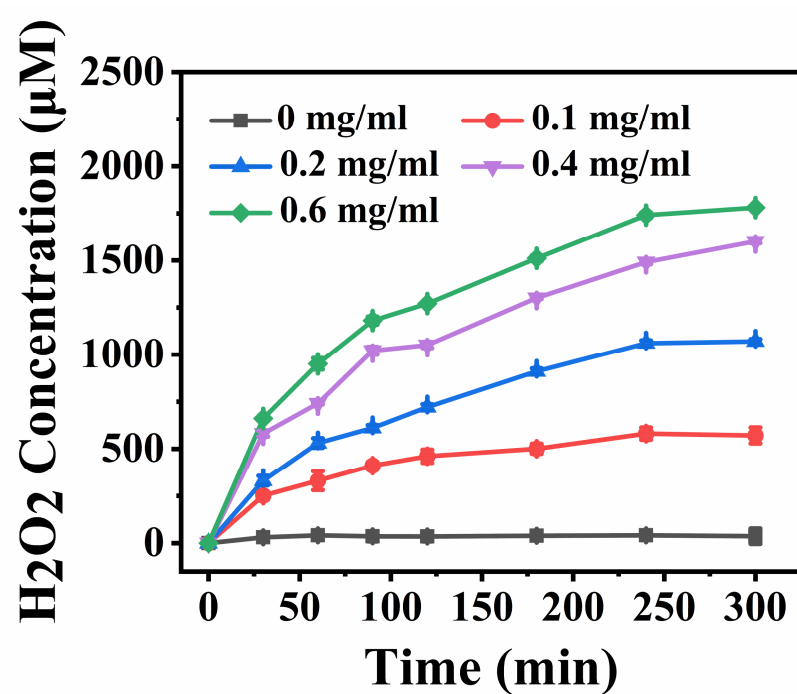

**Figure S16.** Glucose-dependent  $\text{H}_2\text{O}_2$  concentration changes of the mixture of FPBA-IONPs and GOx ([GOx] = 2  $\mu\text{g/mL}$ ). Data were represented as mean  $\pm$  SD (n = 3).

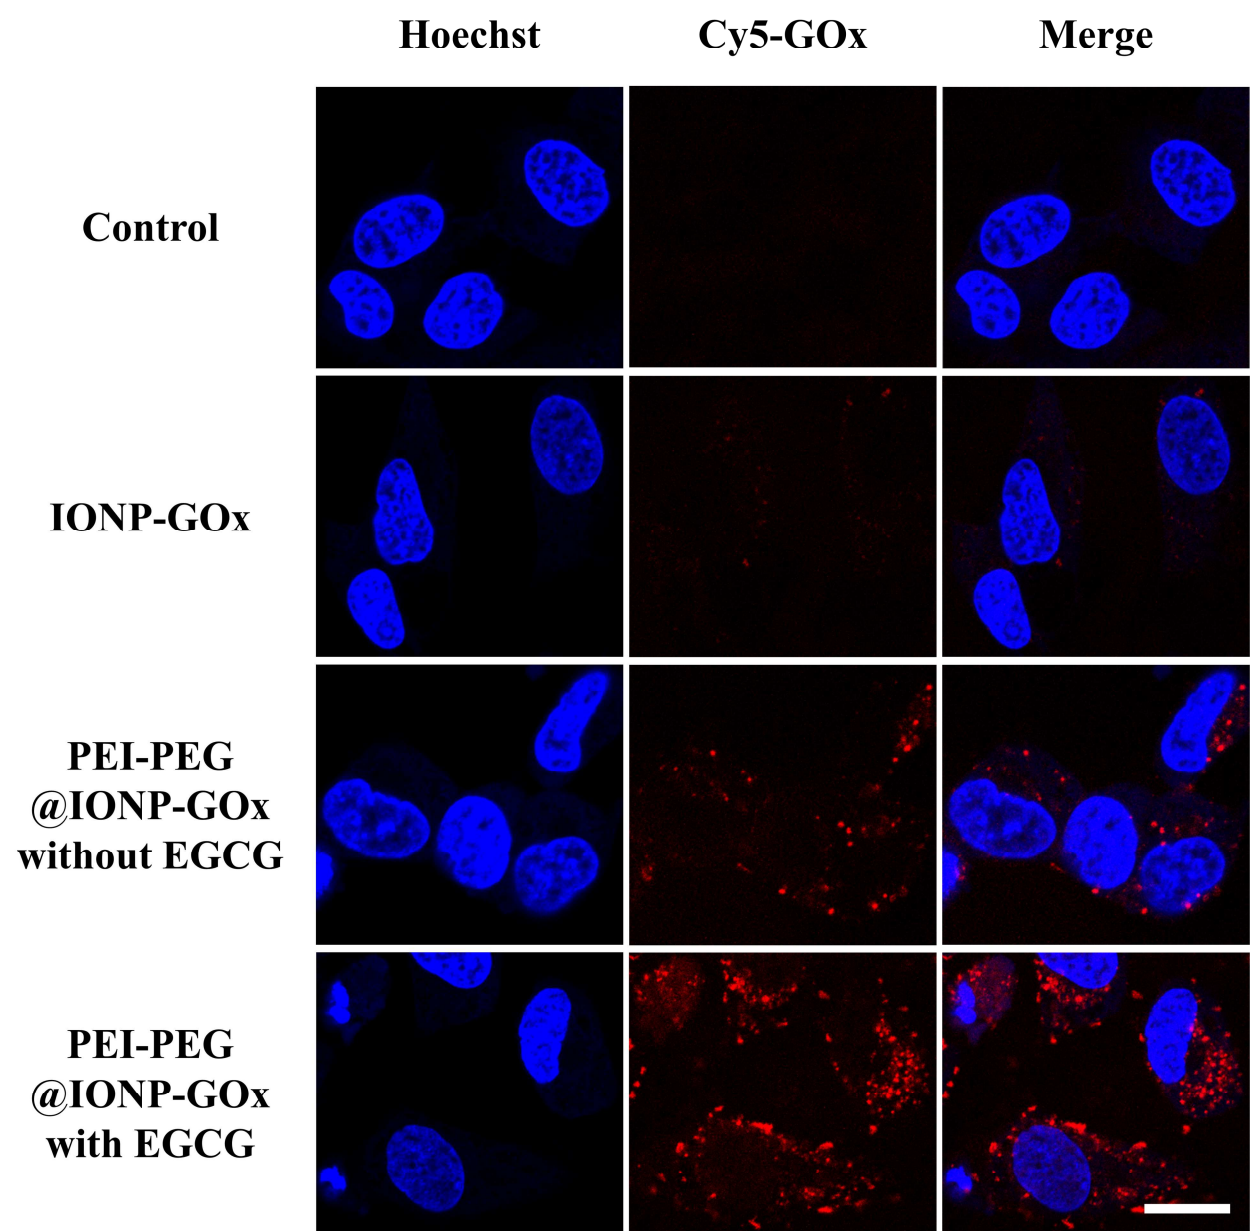

**Figure S17.** CLSM images of Hela cells after incubation with different formulations for 6 h. Scale bar: 20  $\mu\text{m}$ .

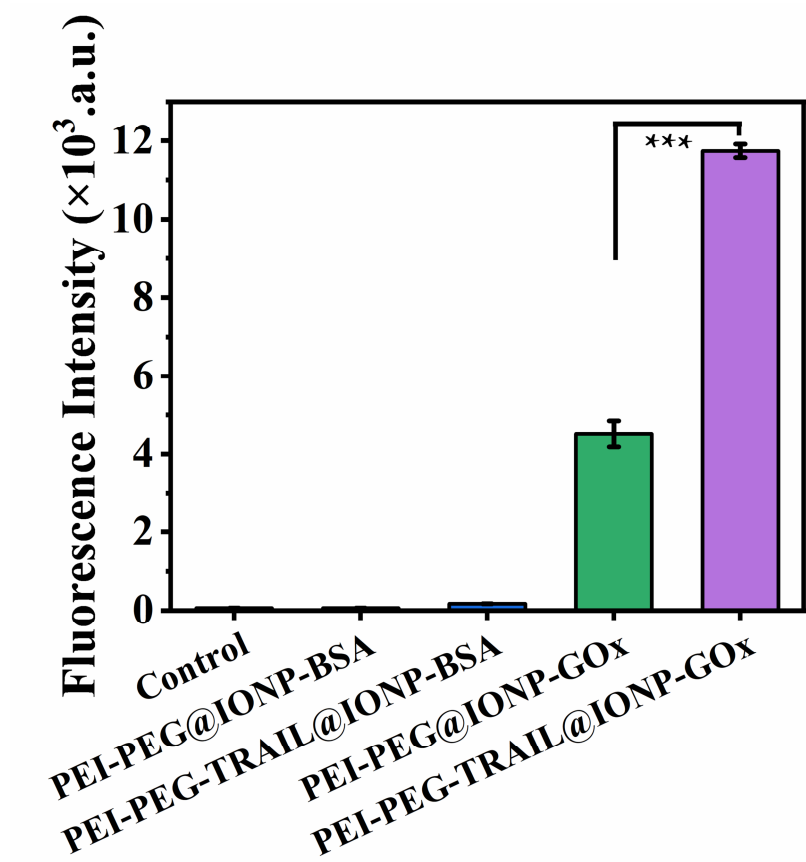

**Figure S18.** Semi-quantitative analysis of ROS generation from the fluorescence images. Data were represented as mean  $\pm$  SD (n = 3). \*\*\*P < 0.001.

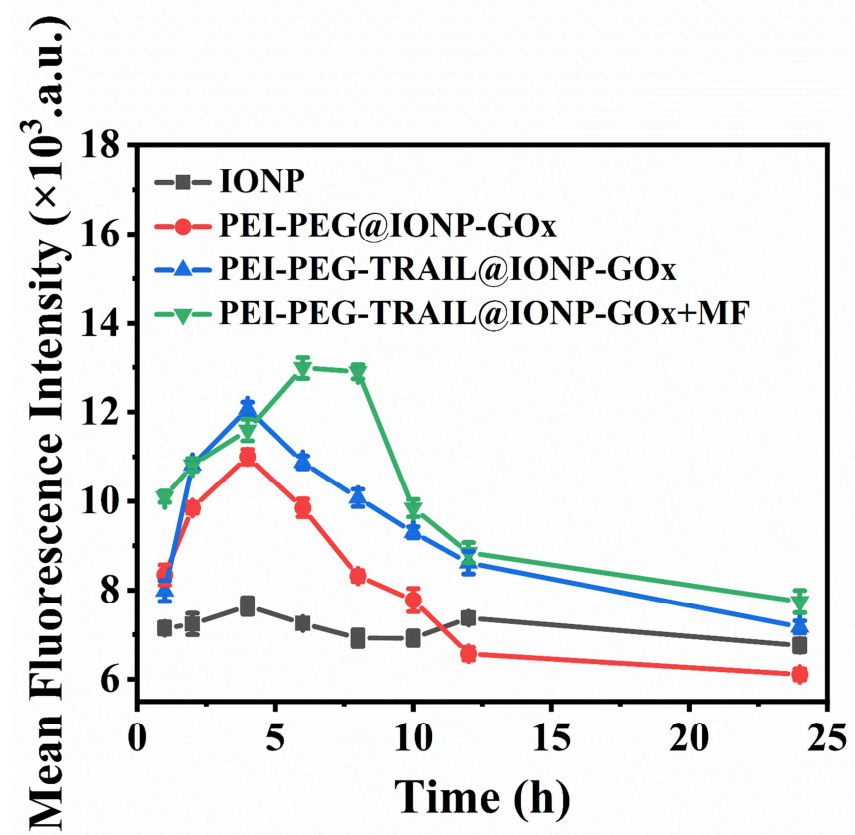

**Figure S19.** Mean fluorescence intensity of the tumor tissues after intravenous injection of different formulations at various time points. Data were represented as mean  $\pm$  SD (n = 3).

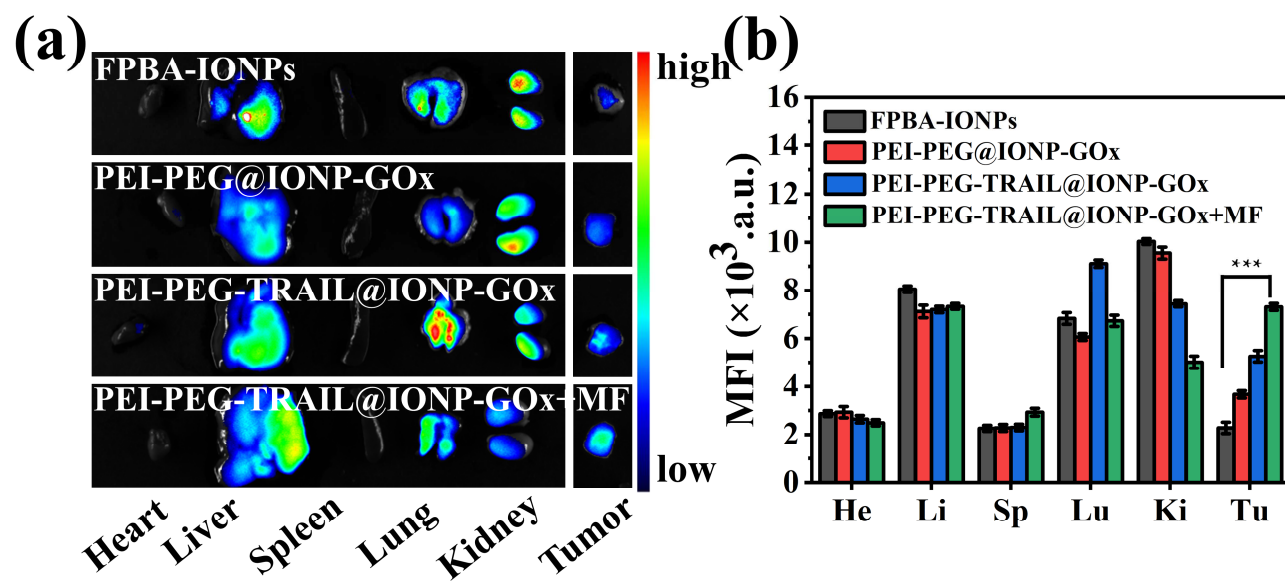

**Figure S20.** *Ex vivo* fluorescence images of major organs and semi-quantitative analysis. (a) *Ex vivo* fluorescence images of major organs and tumors at 4 h after injection of different formulations. (b) The semi-quantitative analysis of fluorescence signal of major organs and tumors after injection of different formulations. Data were represented as mean  $\pm$  SD (n = 3). \*\*\*P < 0.001.

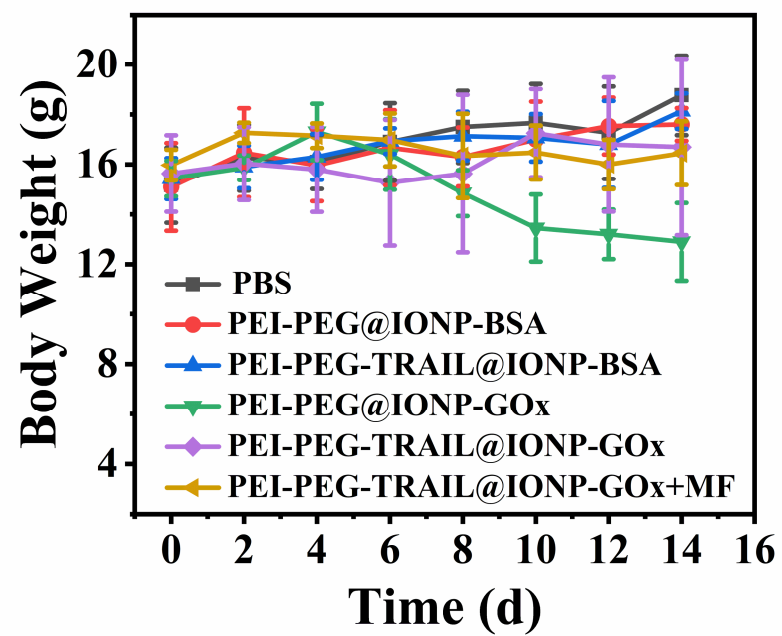

**Figure S21.** Body weight during 14 days treatment. Data were represented as mean  $\pm$  SD (n = 3).



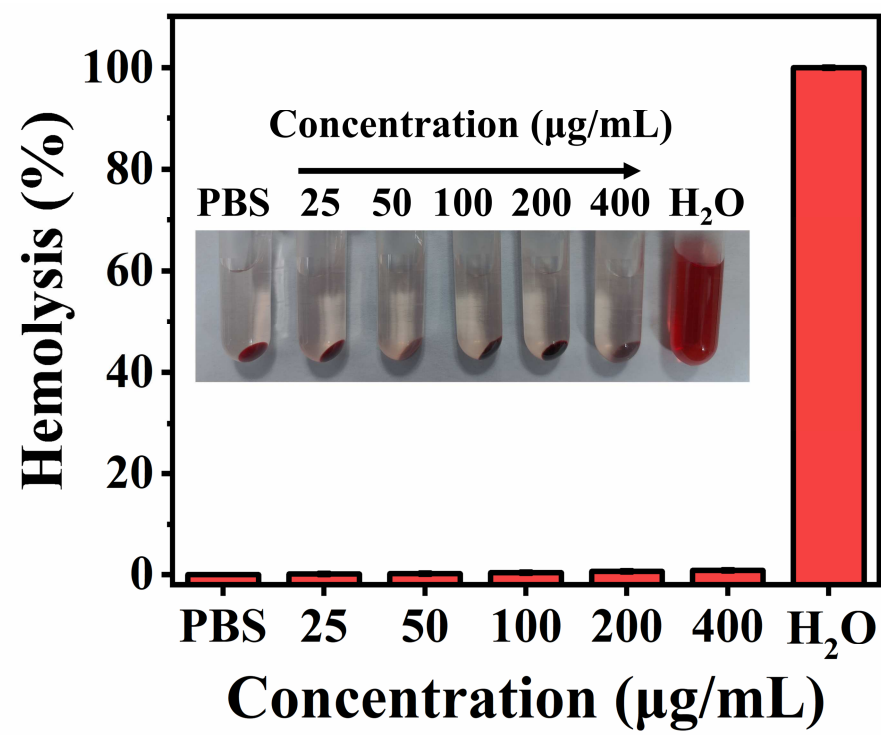

**Figure S22.** Hemolysis analysis of PEI-PEG-TRAIL@IONP-GOx suspension at various concentrations. Data were represented as mean  $\pm$  SD (n = 3).

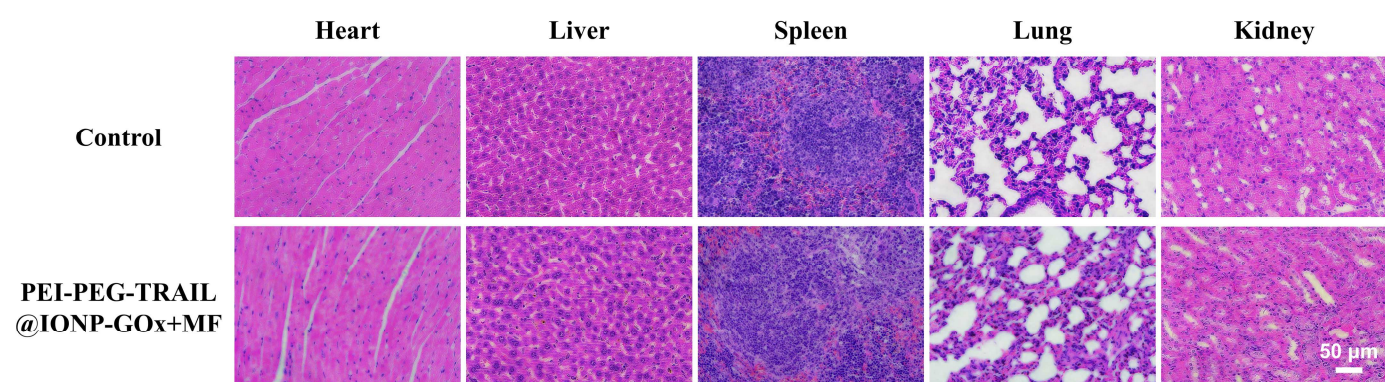

**Figure S23.** H&E staining of major organs (heart, liver, spleen, lung, kidney) for healthy and PEI-PEG-TRAIL@IONP-GOx+MF treated mice.

**Table S1.** Particle size change of IONP-GOx at pH 7.4, 6.5, 5.5.

| Molar ratio of DPA and<br>DPA-FPBA | pH 7.4    | pH 6.5     | pH 5.5      |
|------------------------------------|-----------|------------|-------------|
| 1                                  | 212/-22   | 190/-16.9  | 190/-16.9   |
| 21/4                               | 194/-16.3 | 78.8/-15.3 | 68/-13.37   |
| 18/7                               | 144/-16.7 | 190/-15.3  | 63.4/-17.83 |
| 7/13                               | 267/-22   | 254/-22.4  | 262/-20.6   |
| 0                                  | 104/-27   | N.A.       | N.A.        |
